# Supplementary material for: Enhancing effect of Cu and Sn doping on low-temperature catalytic activity and operating temperature window of γ-Fe2O3 in NH3-SCR of NOx
Source: Royal Society of Chemistry journal article supplement (doi:10.1039/d4nj02320j), 2024-01-01
Supplement: d4nj02320j1.pdf [file d4nj02320j1.pdf]

**Enhancing effect of Cu and Sn doping on low-temperature catalytic activity and  
operating temperature window of  $\gamma$ -Fe<sub>2</sub>O<sub>3</sub> in NH<sub>3</sub>-SCR of NO<sub>x</sub>**

Xiaobo Wang <sup>1,2\*</sup>, Xiaoxue Zhang <sup>1</sup>, Ning Guo <sup>1</sup>, Xiaojie Cao <sup>1</sup>, Jingliang Liu <sup>1</sup>,

Keting Gui <sup>3</sup>

<sup>1</sup> School of Environmental Science, Nanjing Xiaozhuang University, Nanjing 211171,  
Jiangsu, China

<sup>2</sup> College of Chemistry and Materials Science, The Key Laboratory of Electrochemical  
Clean Energy of Anhui Higher Education Institutes, Anhui Provincial Engineering  
Laboratory for New-Energy Vehicle Battery Energy-Storage Materials, Anhui  
Normal University, Wuhu, 241002, Anhui, China

<sup>3</sup> School of Energy and Environment, Southeast University, Nanjing 210096, Jiangsu,  
China

\* Corresponding author & E-mail address: [xb\\_wang88@126.com](mailto:xb_wang88@126.com) (Xiaobo Wang)

## Catalyst characterizations

The specific surface areas of catalysts was tested on a adsorption equipment (3H-2000PS1, Micromeritics, USA) at -196 °C and calculated by the BET method.

The SEM images of catalysts were acquired on FEI QUANTA FEG250 (FEI, USA) scanning electron microscope.

The XRD patterns of catalysts were achieved on a X-ray diffractometer (D8 Advance, Bruker, Germany) with Cu K $\alpha$  radiation.

Raman spectra of these catalysts were obtained on a Raman spectrometer (InVia, Renishaw, U.K.) with a 532 nm Ar<sup>+</sup> laser beam at room temperature. The spectra were collected in the range of 100-800 cm<sup>-1</sup>.

Ammonia temperature-programmed desorption (NH<sub>3</sub>-TPD) tests were performed to evaluate surface acidity of catalysts on a chemisorption analyzer (MicrotracBEL BETCAT-A, Japan). After purged at 300 °C in He for 1 h, 200 mg catalyst was chilled to 50 °C, 30 mL/min of 1% NH<sub>3</sub>-He was then introduced at this temperature until it was saturated. Next, He was injected to purge the gaseous NH<sub>3</sub>. Lastly, the data were gained from 50 to 600 °C.

Hydrogen temperature-programmed reduction (H<sub>2</sub>-TPR) experiments were executed on the same instrument of the NH<sub>3</sub>-TPD test to estimate the redox capacity of these catalysts. Before the test, 50 mg catalyst underwent a one-hour purification process in N<sub>2</sub> at 350 °C, after which they were cooled to 100 °C. Afterward, the reduction experiments were executed from 100 to 600 °C in 30 mL/min of 10% H<sub>2</sub>/Ar mixed gas and the data were recorded simultaneously.

The surface chemical information of different catalysts was obtained by X-ray photoelectron spectroscopy (XPS) measurements (ESCALAB 250Xi, Thermo Fisher, USA) using a radiation of Al K $\alpha$ . All the binding energies were calibrated using the C 1s peak at 284.6 eV.

The *in situ* DRIFT experiments were performed on a FTIR spectrometer (IS20, Nicolet, USA). Before the tests, each catalyst was purified in N<sub>2</sub> for one hour at 400 °C and the background spectra were recorded by cooling the temperature to 240 °C. After pretreating the catalysts for one hour with 1000 ppm NO+5% O<sub>2</sub>/N<sub>2</sub> (1000 ppm NH<sub>3</sub>/N<sub>2</sub>), the gas was changed to 1000 ppm NH<sub>3</sub>/N<sub>2</sub> (1000 ppm NO+5% O<sub>2</sub>/N<sub>2</sub>). Subsequently, the spectra were captured at various times by removing the background spectra automatically.

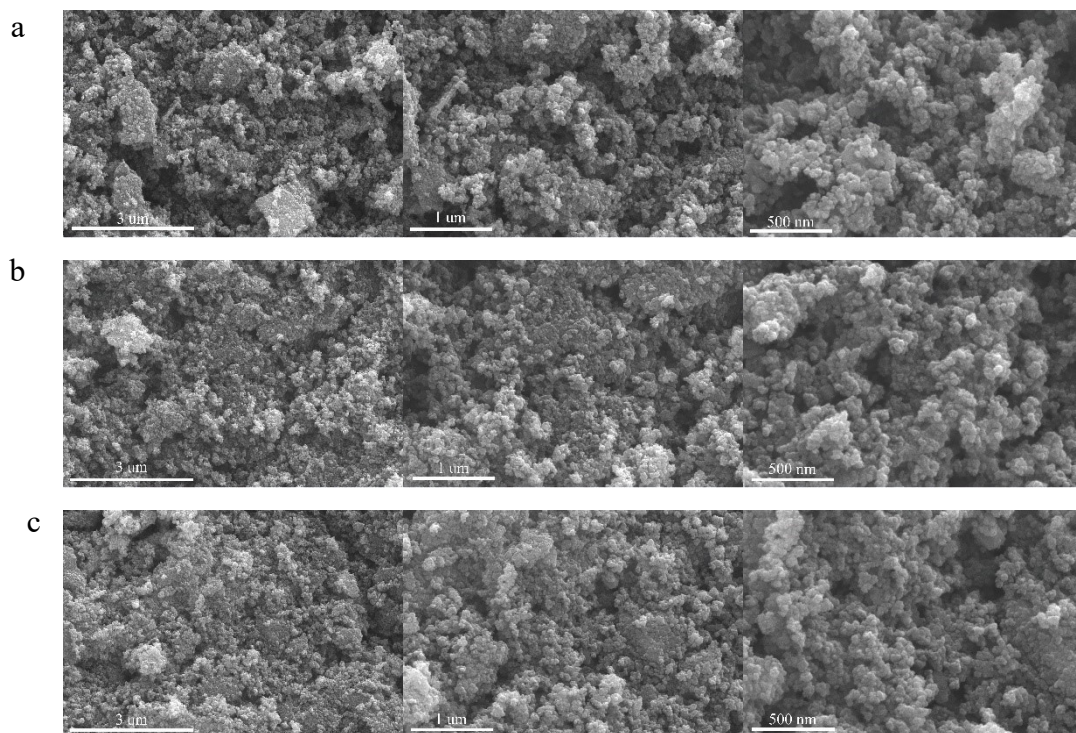

**Fig. S1.** SEM images of these catalysts: (a)  $\gamma\text{-Fe}_2\text{O}_3$ , (b)  $\text{Cu}/\gamma\text{-Fe}$ , and (c)  $\text{Sn}/\gamma\text{-Fe}$ .
